# Supplementary material for: Oxygen vacancy-induced donor–acceptor-conjugated microporous poly(triphenylamine–benzothiadiazole)/TiO2 as a Z-scheme heterojunction photocatalyst towards a visible-light-driven degradation of bisphenol A
Source: Royal Society of Chemistry journal article supplement (doi:10.1039/d0cy02184a), 2021-01-01
Supplement: d0cy02184a1.pdf [file d0cy02184a1.pdf]

**Oxygen vacancy induced donor-acceptor conjugated microporous poly(triphenylamine-benzothiadiazole)/TiO<sub>2</sub> as a Z-scheme heterojunction photocatalyst towards visible-light-driven degradation of Bisphenol A**

Chenrui Liu<sup>a</sup>, Lulu Liu<sup>a</sup>, Yun Liu<sup>a,\*</sup>, Zhi Dang<sup>b</sup>, Chengcheng Li<sup>a</sup>

<sup>a</sup> *Department of Environmental Science and Engineering, College of Environment and Resources,*

*Xiangtan University, Xiangtan, 411105, China*

<sup>b</sup> *School of Environment and Energy, South China University of Technology, Guangzhou, 510006,*

*China*

Procedures of preparing TPA:

50 mL of 1,4-dioxane was added to a mixture of tris- (4-bromophenyl)-amine (1.93 g, 4 mmol), bis(pinacolato)diboron (3.75 g, 15.0 mmol), potassium acetate (2.45 g, 25 mmol) and Pd(dppf)Cl<sub>2</sub> (0.2 g). The reaction solution was then purged with nitrogen gas to remove oxygen and heated up to reflux for overnight. Afterwards, the mixture solution was cooled to room temperature, and poured into water (mixture solution: water = 1:1). The water layer was extracted with ethyl acetate for 2-3 times and the combined organic layer were dried over anhydrous Na<sub>2</sub>SO<sub>4</sub>. After the volatile solvent was removed under reduced pressure, the residue was purified by column chromatography using hexane/ethyl acetate (4/1) as an eluent to yield the product.

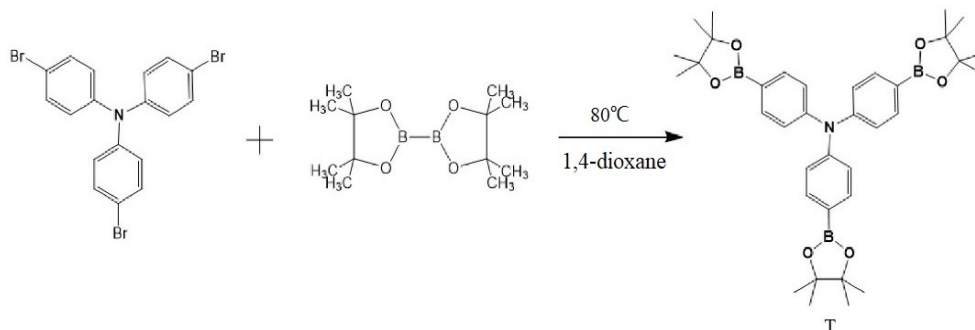

**Fig. S1.** Synthetic rout to TPA

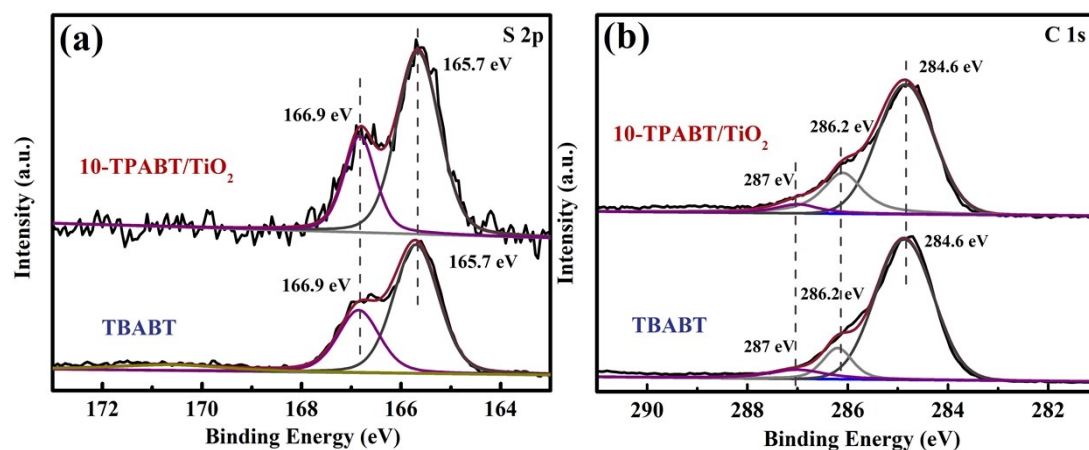

Fig. S2 XPS spectra of TPABT, 10-TPABT/TiO<sub>2</sub> composite. (a): S 2p, (b): C 1s.

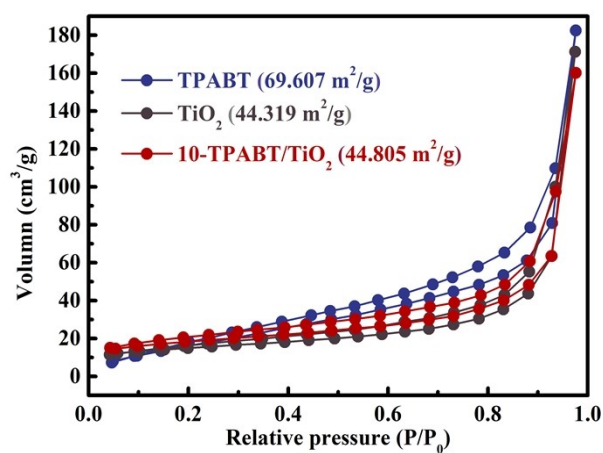

Fig. S3 N<sub>2</sub> adsorption-desorption isotherms of TPABT, TiO<sub>2</sub> and 10-TPABT /TiO<sub>2</sub>.

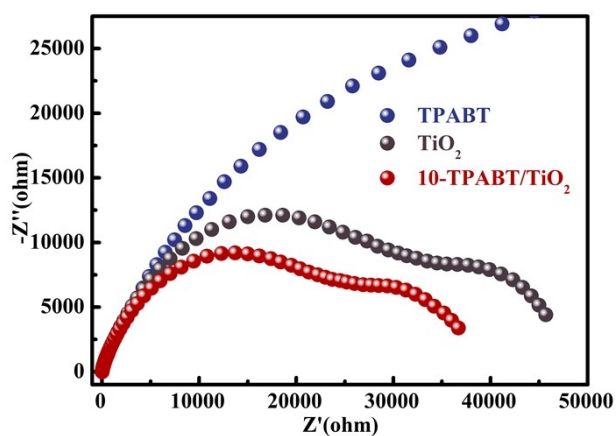

Fig. S4 EIS Nyquist plots of TPABT, TiO<sub>2</sub> and 10-TPABT/TiO<sub>2</sub>.

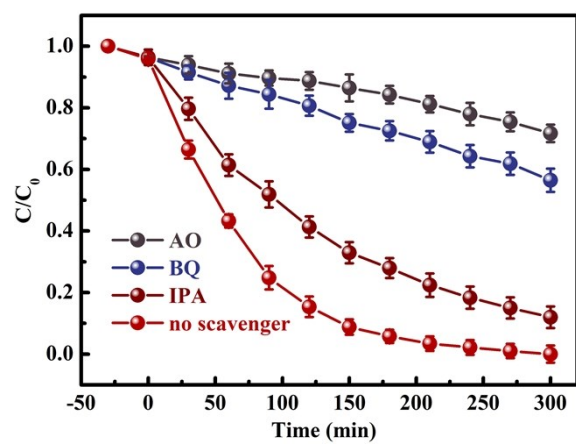

**Fig. S5** Trapping experiment of active species ( $\text{AO} \rightarrow \text{h}^+$ ,  $\text{BQ} \rightarrow \text{O}_2^{\cdot-}$ ,  $\text{IPA} \rightarrow \cdot\text{OH}$ ) for photodegradation of BPA.
